# Supplementary material
Source: MDPI journal article supplement (https://www.mdpi.com/2077-1312/6/4/116)
Supplement: s1 [file s1]

## Sheet: maxHs_reldif
grid resolution	case		maxHs difference relative to 1/24 degree in %
			WW3		SWAN
res =1/3	rmw=25	tspd=3	1.3, 1.0, 0.6, 3.3	0.6 ~ 3.3%	2.5, -2.5, -2.6, -2.6	-2.6 ~2.5%
		tspd=6	-2.7, -3.4, -4.3, -4.8	-4.8 ~ -2.7%	-4.4, -10.3, -11.4, -12.6	-12.6~ -4.4%
		tspd=9	-2.5, -5.3 -5.7,-6.0	-6.0~ -2.5%	-8.1, -14.3, -15.2, -15.7	-15.7 ~ -8.1%
	rmw=50	tspd=3	-1.5, -3.8, -3.8, -4.1	-4.1 ~ -1.5%	3.0, 1.1, 0.1, -0.6	-0.6 ~ 3.0%
		tspd=6	-2.9, -4.3, -4.2, -4.3	-4.3 ~ -2.9%	-1.4, -1.7, -3.5, -4.8	-4.8~ -1.4%
		tspd=9	-0.2, -2.0, -2.7, -3.2	-3.2 ~ -0.2%	-4.6, -4.7, -6.2, -6.8	-6.8 ~ -4.6%
res=1/6	rmw=25	tspd=3	-1.4, -3.2, -3.1 -3.5	-3.5 ~ -1.4%	1.6, 1.5, 0.4, -0.8	-0.8~1.6%
		tspd=6	-2.0, -3.3, -3.4 -3.5	-3.5 ~ -2.0%	-2.4, -2.4, -3.8, -4.6	-4.6~ -2.4%
		tspd=9	0.6, -1.5, -1.9, -2.3	-2.3 ~ 0.6%	-4.3, -5.0, -5.9, -6.3	-6.3 ~ -4.3%
	rmw=50	tspd=3	-1.9, -2.4, -2.3, -2.4	-2.4~ -1.9%	2.6, 1.4, 0.4, -1.0	-1.0 ~ 2.6%
		tspd=6	-2.5, -2.4, -2.5, -2.7	-2.7~ -2.4%	1.8, 0.9, -0.3, -1.3	-1.3~1.8%
		tspd=9	-0.6, -0.7, -0.8, -1.1	-1.1~ -0.6%	0.3, -0.8, -1.6, -2.1	-2.1 ~ 0.3%
res=1/12	rmw=25	tspd=3	-1.4, -1.3, -1.3, -1.6	-1.6 ~ -1.3%	2.2, 1.1, 0.5, -0.3	-0.3~ 2.2%
		tspd=6	-1.6, -1.3,-1.5,-1.7	-1.7 ~ -1.3%	0.9, 0.1, -0.4, -1.1	-1.1~0.9%
		tspd=9	0.3, 0, -0.1,-0.4	-0.4 ~ 0.3 %	-0.3, -1.1, -1.5, -1.9	-1.9 ~ -0.3%
	rmw=50	tspd=3	-0.4, -0.6, -0.7, -0.7	-0.7~ -0.4%	0.7, 0.5, 0, -0.5	-0.5 ~ 0.7%
		tspd=6	-0.5, -0.7 -0.7, -0.8	-0.8~ -0.5%	0.8, 0.6, 0.2, -0.2	-0.2 ~ 0.8%
		tspd=9	0.1, 0, 0.1, 0	0~ 0.1%	0.2, 0.2, -0.3, -0.4	-0.4 ~ 0.2%

## Sheet: Hs_reldif
grid resolution	case		overestimation (%)				underestimation (%)
			WW3		SWAN		WW3		SWAN
res =1/3	rmw=25	tspd=3	92.1； 87.2；87.5；70.4	70.4~92.1%	107.9; 104.7; 106.2; 86.1	86.1 ~107.9%	0；-2.2；-0.8；-10.5	-10.5~0%	-3.9; -3.0; -2.8; -9.8	-9.8~-2.8%
		tspd=6	61.6; 61.5; 62.3; 51.2	51.2~62.3%	41.3; 42.5; 42.6; 30.1	30.1~42.6%	-8.3; -7.5; -6.9; -15.7	-15.7~-6.9%	-14.6; -13.2; -11.7; -19.0	-19.0~ -11.7%
		tspd=9	45.4; 46.4; 52.0; 49.8	45.4~52.0%	27.9; 26.7; 25.8; 26.9	25.8~27.9%	-11.6; -10.7; -8.7; -17.4	-17.4~-8.7%	-19.3; -18; -16.6; -22.9	-22.9% ~ -16.6%
	rmw=50	tspd=3	62.1; 62.0; 61.7; 64.2	61.7~64.2%	88.4; 89.2; 89.8; 90.7	88.4~90.7%	-4.9; -5.0; -4.3; -6.3	-6.3~ -4.3%	-2.6; -3.3; -3.1; -2.5	-3.3~ -2.5%
		tspd=6	64.1; 63.6; 62.8; 60.9	60.9~64.1%	57.9; 59.1; 58.1; 54.7	54.7~59.1%	-5.9; -6.3; -7.6; -8.4	-8.4~ -5.9%	-6.5; -8.3; -7.7; -7.9	-8.3~ -6.5%
		tspd=9	24.4; 25.6; 26.5; 26.5	24.4~26.5%	21.0; 20.8; 20.9; 23.0	20.8~ 23%	-6.3; -5.8; -6.1; -6.9	-6.9~ -5.8%	-9.4; -10.4; -11.1; -10.2	-11.1 ~ -9.4%
res=1/6	rmw=25	tspd=3	41.5； 41.9；42.9; 43.2	41.5~43.2%	59.5; 60.4; 61.0; 61.3	59.5~61.3%	-3.6; -4.4; -4.3; -6.0	-6.0~ -3.6%	-1.5; -2.9; -2.3; -2.1	-2.9~ -1.5%
		tspd=6	32.5; 31.3; 30.8; 32.0	30.8~32.5%	25.5; 25.5; 24.4; 24.0	24.0~25.5%	-4.9; -5.0; -6.0; -6.9	-6.9~-4.9%	-6.2; -7.2; -7.3; -7.1	-7.3~ -6.2%
		tspd=9	21.5; 21.8; 24.2; 26.3	21.5~26.3%	14.0; 13.7; 13.9; 15.4	13.7~15.4%	-5.2; -4.7; -4.8; -5.4	-5.4~ -4.7%	-8.9; -7.9;-8.2; -8.7	-8.9~ -7.9%
	rmw=50	tspd=3	30.4; 30.1; 30.0; 30.6	30.0~30.6%	42.6; 43.2; 44.0; 44.3	42.6~44.3%	-2.7; -2.5; -2.6; -4.4	-4.4~-2.5%	-3.3; -3.1; -2.6; -2.6	-3.3 ~ -2.6%
		tspd=6	35.1; 35.3; 35.9; 36.0	35.1~36.0%	30.5; 31.1; 31.0; 29.7	29.7~31.1%	-3.3; -3.4; -3.9; -5.3	-5.3 ~ -3.3%	-3.9; -5.4; -4.6; -4.6	-5.4~ -3.9%
		tspd=9	13.7; 14.4; 15.3; 14.4	13.7~15.3%	10.7; 10.8; 10.9; 11.4	10.7~ 11.4%	-2.4; -2.4; -2.8; -3.9	-3.9~-2.4%	-5.3; -7.3; -6.5; -5.7	-7.3 ~ -5.3%
res=1/12	rmw=25	tspd=3	14.2; 13.8; 14.3; 15.6	13.8~15.6%	21.9; 21.8; 21.9; 23.1	21.8~ 23.1%	-1.6; -1.6; -1.7; -3.8	-3.8~-1.6%	-1.4; -1.9; -1.5; -1.7	-1.9~ -1.4%
		tspd=6	13.0; 12.7; 12.6; 14.5	12.6~14.5%	10.1; 10.1; 9.7; 9.8	9.7~10.1%	-2.0; -2.1; -2.2; -3.8	-3.8~-2.0%	-2.2; -3.8; -3.3; -3.3	-3.8~ -2.2%
		tspd=9	9.8; 10.1; 10.7; 11.0	9.8~11.0%	5.0; 4.9; 5.3; 6.1	4.9~6.1%	-1.6; -1.4; -1.4; -2.8	-2.8~ -1.4%	-2.8; -3.2; -3.6; -4.2	-4.2~ -2.8%
	rmw=50	tspd=3	10.7; 10.6; 10.2; 10.9	10.2~10.9%	15.8; 16.4; 16.2; 16.9	15.8~16.9%	-0.9; -0.9; -0.9; -1.3	-1.3~-0.9%	-2.0; -1.7; -1.6; -1.4	-2.0~ -1.4%
		tspd=6	15.7; 16.3; 16.8; 16.1	15.7~16.8%	11.3; 11.6; 11.5; 11.8	11.3~11.8%	-1.9; -2.0; -2.2; -1.8	-2.2~ -1.8%	-2.4; -2.2; -1.8; -1.7	-2.4~ -1.7%
		tspd=9	6.5; 6.2; 6.5; 6.7	6.2~6.7%	4.1; 4.1; 4.2; 4.5	4.1~4.5%	-1.1; -0.9; -0.9; -1.2	-1.2~-0.9%	-2.8; -3.2; -2.6; -1.9	-3.2~-1.9%
